# Supplementary material for: Accumulation of Trehalose-6-Phosphate in Candida auris results in Decreased Echinocandin Resistance and Tolerance by Affecting Cell Wall Chitin Synthesis
Source: Research Square preprint supplement (doi:10.21203/rs.3.rs-6681474/v1), 2025-05-22
Supplement: Supplementary file 1 [file b064d825e5b5183a3bba5202.docx]

# Accumulation of Trehalose-6-Phosphate in *Candida auris* results in Decreased Echinocandin Resistance and Tolerance by Affecting Cell Wall Chitin Synthesis

Qingjuan Zhu1, Sien Van de Velde1, Stefanie Wijnants1, Hans Carolus1,§, Stef Jacobs1, Dimitrios Sofras1, Paul Vandecruys1, Odessa Vangoethem1, Regina Feil2, Rudy Vergauwen1, Wouter Van Genechten1, Wim Van den Ende3,4, Uwe Himmelreich5, John E. Lunn2, Patrick Van Dijck1,6, *

1Laboratory of Molecular Cell Biology, Department of Biology, Institute of Botany and Microbiology, KU Leuven, Kasteelpark Arenberg 31, 3000-Leuven, Belgium

2Max Planck Institute of Molecular Plant Physiology, Am Mühlenberg 1, 14476 Potsdam-Golm, Germany

3 Laboratory of Molecular Plant Biology, KU Leuven, Leuven, Belgium

4 KU Leuven Plant Institute

5Biomedical MRI Unit, Department of Imaging and Pathology, Group Biomedical Sciences, KU Leuven, Leuven 3000, Belgium

6KU Leuven One Health Institute

**SUPPLEMENTARY MATERIAL**

**Supplementary Table 1 – Strains, plasmids and primers used in this study**

List of strains:

| **Strains** | **Genotype** | **Source** |
| --- | --- | --- |
| Clade I WT | B8441 (South Asian) | [1](#_ENREF_1) |
| Clade III WT | B11221 (African) | [1](#_ENREF_1) |
| Clade IV WT | B11244 (Venezuela) | [2](#_ENREF_2) |
| Clade V WT | AR1097 (Iran) | [3](#_ENREF_3) |
| Clade I *tps1∆* | B8441 *tps1∆*:::FRT | This work |
| Clade I *tps2∆* | B8441 *tps2∆*:::FRT | This work |
| Clade I *tps1∆ tps2∆* | B8441 *tps1∆*:::FRT *tps2∆*:::FRT | This work |
| Clade III *tps1∆* | B11221 *tps1∆*:::FRT::Nat::FRT | This work |
| Clade III *tps2∆* | B11221 *tps2∆*:::FRT::Nat::FRT | This work |
| Clade IV *tps1∆* | B11244 *tps1∆*:::FRT::Nat::FRT | This work |
| Clade IV *tps2∆* | B11244 *tps2∆*:::FRT::Nat::FRT | This work |
| Clade V *tps1∆* | AR1097 *tps1∆*:::FRT::Nat::FRT | This work |
| Clade V *tps2∆* | AR1097 *tps2∆*:::FRT::Nat::FRT | This work |
| Clade I *gfa1∆* | B8441 *gfa1∆*:::FRT::Nat::FRT | This work |

List of plasmids:

| **Plasmid** | **Description** | **Used for** | **Source** |
| --- | --- | --- | --- |
| pSFS2 | NatMX cassette flanked by FRT sites | Construction of deletion cassette | [4](#_ENREF_4) |
| pSFS2-Ptps1-Ttps1 | NatMX cassette with *TPS1* promoter and terminator | Construction of *TPS1* deletion strains | This work |
| pSFS2-Ptps2-Ttps2 | NatMX cassette with *TPS2* promoter and terminator | Construction of *TPS2* deletion and *TPS1/TPS2* double deletionstrains | This work |
| pSFS2-Pgfa1-Tgfa1 | NatMX cassette with *NTH1* promoter and terminator | Construction of *GFA1* deletion strains | This work |

List of primers:

| **Primer** | **Name** | **Sequence** | **used for** |
| --- | --- | --- | --- |
| D-6660 | pSPS2_Cau*TPS1*_Prom_Fw | GAAAGTATAGGAACTTCCTCGA | Construction *TPS1* deletion cassette |
| D-6661 | pSPS2_Cau*TPS1*_Prom_Rev | AACAAAAGCTGGGTACCGGGCCTTTTTCACTGGCTATGCAACTG | Construction *TPS1* deletion cassette |
| D-6662 | pSPS2_Cau*TPS1*_Term_Fw | ACTCACTATAGGGCGAATTGGGAAAGAACAAGAAGTCTCAAA | Construction *TPS1* deletion cassette |
| D-6663 | pSPS2_Cau*TPS1*_ Term _Rev | CAGATCCACTAGTTCTAGAGCATATAGACGGACTTTAACGTT | Construction *TPS1* deletion cassette |
| D-6664 | pSPS2_Cau*TPS2*_Prom_Fw | GAAAGTATAGGAACTTCCTCGATAAAGAGAATGGAGCGGTGTGG | Construction *TPS2* deletion cassette |
| D-6665 | pSPS2_Cau*TPS2*_Prom_Rev | GAACAAAAGCTGGGTACCGGGCCTTCAGCACCCACTTTGAGGACGC | Construction *TPS2* deletion cassette |
| D-6666 | pSPS2_Cau*TPS2*_Term_Fw | CTCACTATAGGGCGAATTGGACTTGTCTTCGCTCTTATGC | Construction *TPS2* deletion cassette |
| D-6667 | pSPS2_Cau*TPS2*_ Term _Rev | CAGATCCACTAGTTCTAGAGCCATTCCACTAGTGCATTTT | Construction *TPS2* deletion cassette |
| D-5901 | pSAT1_US_cPCR_Rev | CTGATGTGAATGGTACG | Plasmid verify check |
| D-5902 | pSAT1_DS_cPCR_Fw | ACATATGTGAAGTGTGAAGGGGG | Plasmid verify check |
| D-6668 | C.au *TPS1* deletion check_Fw | GATGTTAAGTAGAGAGCG | *TPS1* deletion verify check |
| D-6669 | C.au *TPS1* deletion check_Rev | AGATGAAAAATCTGACAA | *TPS1* deletion verify check |
| D-6670 | C.au *TPS2* deletion check_Fw | TCCTAAGATTGTGTCCAC | *TPS2* deletion verify check |
| D-6671 | C.au *TPS2* deletion check_Rev | GGGGTTCTGCCTCTCTTC | *TPS2* deletion verify check |
| D-8026 | pSPS2_Cau*GFA1*_Prom_Fw | TAGAAAGTATAGGAACTTCCGTCTATAAAGCGCTGATATAGAGG | Construction *GFA1* deletion cassette |
| D-8027 | pSPS2_Cau*GFA1*_Prom_Rev | CAAAAGCTGGGTACCGGGCCCATTACGCGGGTCTGGAC | Construction *GFA1* deletion cassette |
| D-8028 | pSPS2_Cau*GFA1*_Term_Fw | CTATAGGGCGAATTGGAGCTAGTACACTAACACGGTCAG | Construction *GFA1* deletion cassette |
| D-8029 | pSPS2_Cau*GFA1*_ Term _Rev | AGATCCACTAGTTCTAGAGCATAGAGTGCTGGAGAAAC | Construction *GFA1* deletion cassette |
| D-8075 | Cau *GFA1* deletion check_Fw | GAACAAGGAGCCAAAAGG | *GFA1* deletion verify check |
| D-8076 | Cau *GFA1* deletion check_Rev | CATTTCGAACAGTTTAGC | *GFA1* deletion verify check |
| D-8077 | Cau *GFA1* deletion genome inside check_Fw | GTGGACAAAACGAGAGGT | *GFA1* deletion verify check |
| D-8078 | Cau *GFA1* deletion genome inside check_Rev | TTCTTGGGAAGTCCACAT | *GFA1* deletion verify check |
| D-8468 | Cau ACT1 Qpcr_Fw | CCAGGGTATCATGGTTGGTATG | Reference gene for Qpcr |
| D-8469 | Cau ACT1 Qpcr_Rev | CCGTGCTCAATTGGGTATCT | Reference gene for Qpcr |
| D-8470 | Cau RPL10 Qpcr_Fw | CCAGAGTTCAGGATGTCAAGTC | Reference gene for Qpcr |
| D-8471 | Cau RPL10 Qpcr_Rev | ACGTCCTCCTCCATCTCAA | Reference gene for Qpcr |
| D-8255 | Cau *CHS1* Qpcr_Fw | AGCAAGGCGGTTTCGTATTC | *CHS1* Qpcr |
| D-8256 | Cau *CHS1* Qpcr_Rev | TTGTTGTGGAGCCATGATGG | *CHS1* Qpcr |
| D-8257 | Cau *CHS2* Qpcr_Fw | ACGGCAGAACAGTTTACGAC | *CHS2* Qpcr |
| D-8258 | Cau *CHS2* Qpcr_Rev | ACAGTCAAGCACCAAATGGC | *CHS2* Qpcr |
| D-8073 | Cau *CHS3* Qpcr_Fw | CCGAGATGGTAAGTGGGTTAAG | *CHS3* Qpcr |
| D-8074 | Cau *CHS3* Qpcr_Rev | GTACTCCAACTGGGTCATTCTC | *CHS3* Qpcr |
| D-8259 | Cau *CHS8* Qpcr_Fw | ATCCCTCGTTCGAGTACAATGG | *CHS8* Qpcr |
| D-8260 | Cau *CHS8* Qpcr_Rev | TTGCCATTTCGTCGACGTTC | *CHS8* Qpcr |
| D-8261 | Cau *FKS1* Qpcr_Fw | CTATGAGAATGCCGACGAAGAA | *FKS1* Qpcr |
| D-8262 | Cau *FKS1* Qpcr_Rev | GCAGCAGACTTGAAACCAATAC | *FKS1* Qpcr |
| D-8265 | Cau *FKS2* Qpcr_Fw | CTCAGATCCCAGACACTTTACC | *FKS2* Qpcr |
| D-8266 | Cau *FKS2* Qpcr_Rev | CGTGTGGTCTTTGCTGATTTC | *FKS2* Qpcr |
| D-7913 | Cau *GFA1* Qpcr_Fw | GTGAGTCTACCTTTCGTCCTATC | *GFA1* Qpcr |
| D-7914 | Cau *GFA1* Qpcr_Rev | GCTGCTCAAAGATCTCCTTCT | *GFA1*Qpcr |
| D-7801 | Cau *TPS1* Qpcr_Fw | TCAAATGTTGAGGGAGGAGTTG | *TPS1* Qpcr |
| D-7802 | Cau *TPS1* Qpcr_Rev | CCGAAGATGGGAAAGGTGTATG | *TPS1* Qpcr |
| D-7805 | Cau *TPS2* Qpcr_Fw | TGCACCCGGTATGGTTATTG | *TPS2* Qpcr |
| D-7806 | Cau *TPS2* Qpcr_Rev | GTTGGGCTGACCTTGGATATAA | *TPS2* Qpcr |
| / | Cau_*TPS1*_crRNA | GGCGGTCACCAACCCTCCTG | Guide RNA for CRISPR-Cas9 |
| / | Cau_*TPS2*_crRNA | ACTGGGAGAGCCATCTTATC | Guide RNA for CRISPR-Cas9 |
| / | Cau_*GFA1*_crRNA | GGTGTCTTGGCATTGGTTGA | Guide RNA for CRISPR-Cas9 |

**Supplementary Figures**


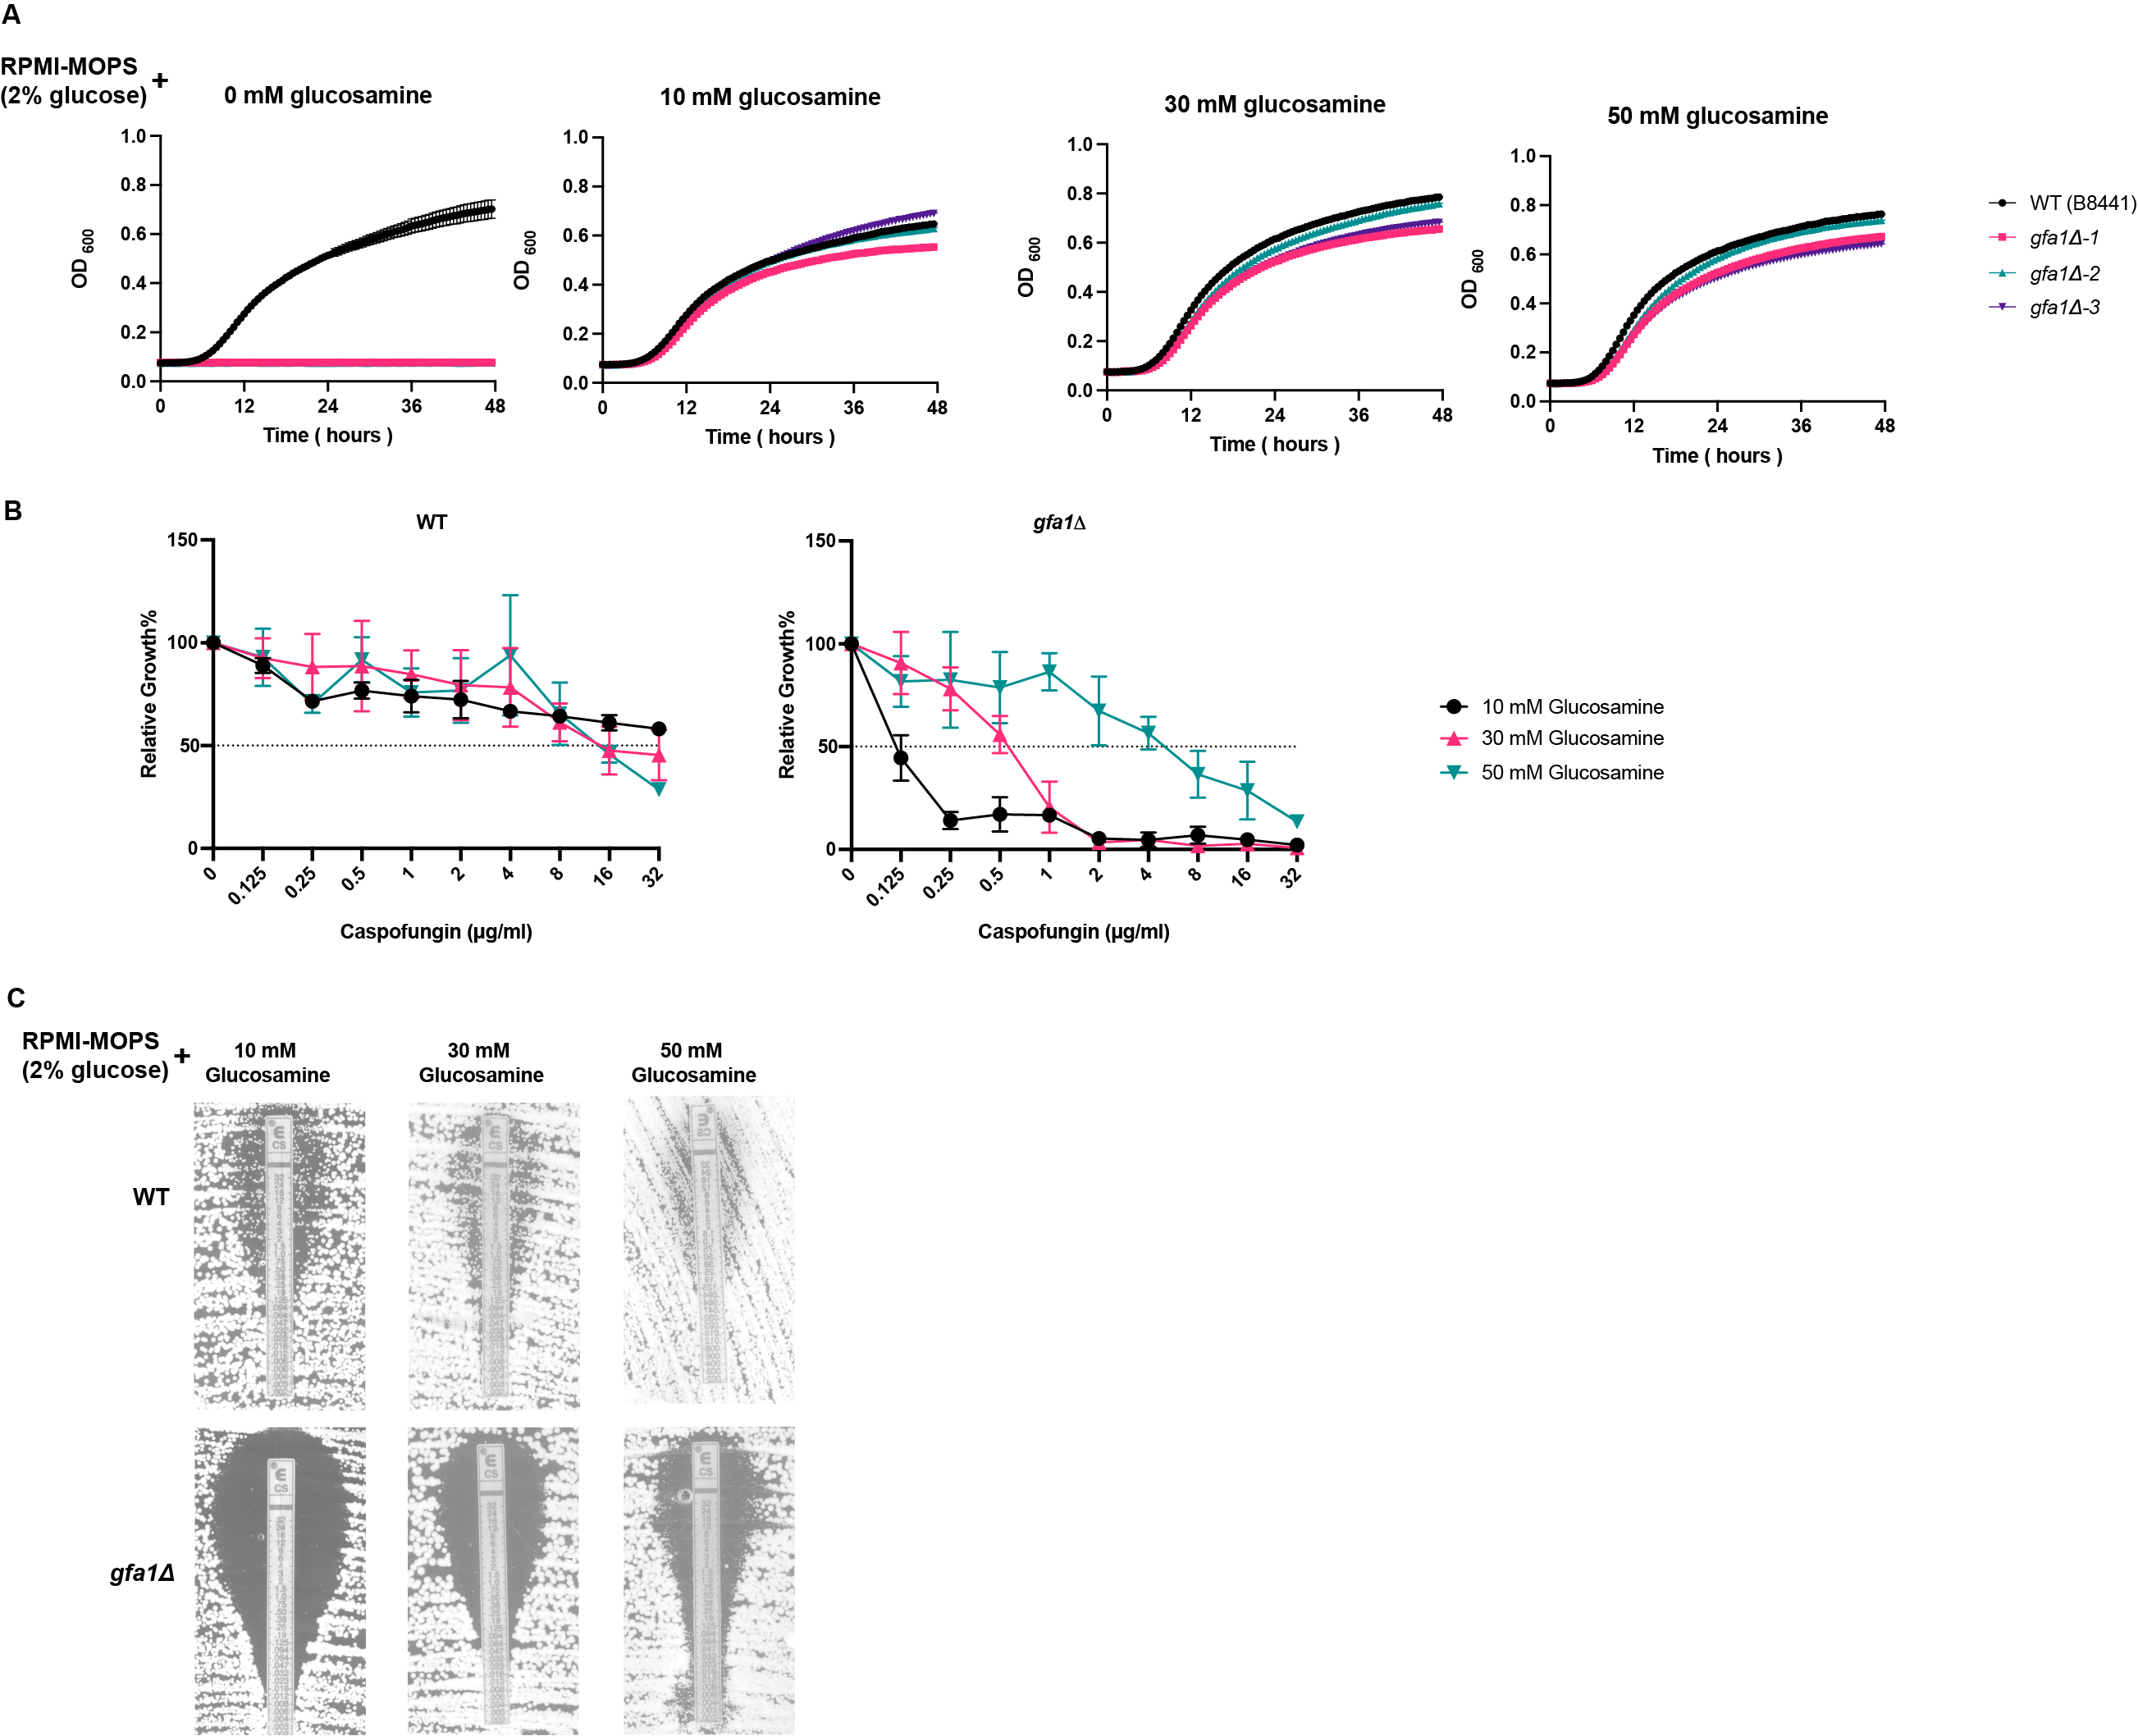


**Figure S1. *GFA1* is essential for growth and modulates caspofungin susceptibility in *C. auris*. (A)** Growth curves of WT and *gfa1Δ* strains cultured in liquid RPMI 1640 medium supplemented with 2% glucose and varying concentrations of glucosamine (10, 30, and 50 mM) at 37 °C. Optical density at 600 nm was measured over a 48-hour period. Data represent the mean of two technical replicates per strain. **(B)** Broth dilution assay (BDA) evaluating caspofungin susceptibility in WT and *gfa1Δ* strains grown on RPMI 1640 agar supplemented with 2% glucose and increasing concentrations of glucosamine (10, 30, and 50 mM). Error bars represent standard deviation from two technical replicates. **(C)** Etest analysis performed at 37 °C for 48 hours on RPMI 1640 agar plates supplemented with 2% glucose and the indicated concentrations of glucosamine (10, 30, and 50 mM). The formation of inhibitory zones (“halos”) indicates areas of high antifungal concentration where cell growth is suppressed.

Figure S2: 13C NMR spectra acquired approximately 2 ½ hours after addition of 13C-labeled glucose. The different labels refer to the following compounds: 1 – C-1β glucose, 2 – C-1 α glucose, 3 – C-1 trehalose, 4 – C-1 trehalose-6-phosphate, 5 – C-1 mannitol, 6 – C-1 glycerol, 7 – C-2 ethanol, M – signals from the buffer (MOPS).

References:

1 Lockhart, S. R. *et al.* Simultaneous Emergence of Multidrug-Resistant *Candida auris* on 3 Continents Confirmed by Whole-Genome Sequencing and Epidemiological Analyses. *Clin Infect Dis* **64**, 134-140 (2017). <https://doi.org:10.1093/cid/ciw691>

2 de Groot, T., Puts, Y., Berrio, I., Chowdhary, A. & Meis, J. F. Development of *Candida auris* Short Tandem Repeat Typing and Its Application to a Global Collection of Isolates. *mBio* **11** (2020). <https://doi.org:10.1128/mBio.02971-19>

3 Chow, N. A. *et al.* Potential Fifth Clade of *Candida auris*, Iran, 2018. *Emerg Infect Dis* **25**, 1780-1781 (2019). <https://doi.org:10.3201/eid2509.190686>

4 Reuss, O., Vik, A., Kolter, R. & Morschhäuser, J. The SAT1 flipper, an optimized tool for gene disruption in *Candida albicans*. *Gene* **341**, 119-127 (2004). <https://doi.org:10.1016/j.gene.2004.06.021>
